# Supplementary material
Source: Royal Society of Chemistry journal article supplement (doi:10.1039/d6ta03606f)
Supplement: d6ta03606f1.pdf [file d6ta03606f1.pdf]

## **Supplementary Information**

### **Unveiling the Mechanism of Fe-Doping-Enhanced Oxygen Evolution Reaction of CoSe**

Wenshuo Tang, Pan Zhang, Ziwei Bian, Yong Xu, Qiliang Wei, Dongjiang  
Yang, Daohao Li, Qiao Liu,\* Weiyu Yang, Qing Shi\*

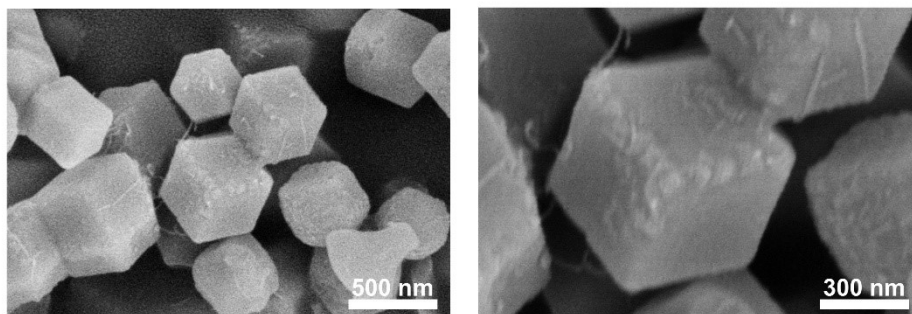

**Figure S1.** SEM images of Co-ZIF.

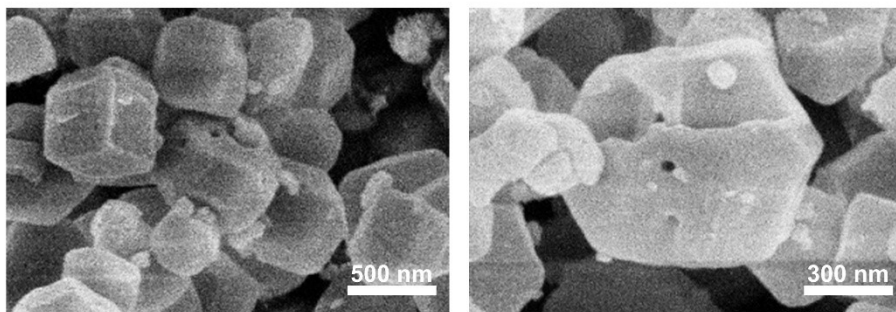

**Figure S2.** SEM images of CoFe-ZIF.

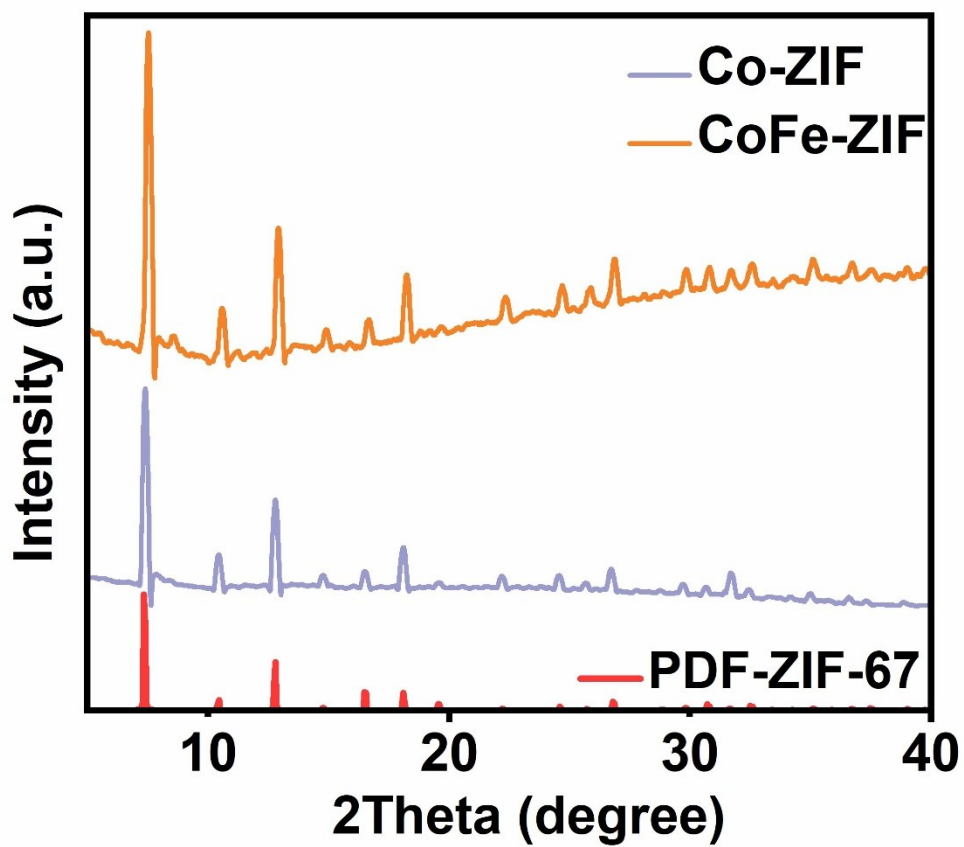

**Figure S3.** XRD patterns of Co-ZIF and CoFe-ZIF.

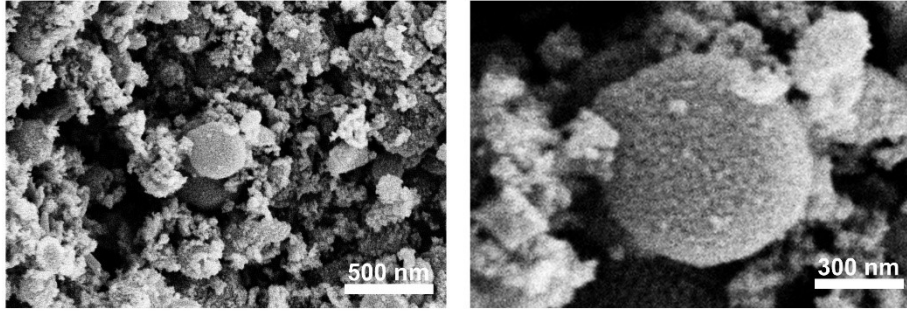

**Figure S4.** SEM images of CoFeSe.

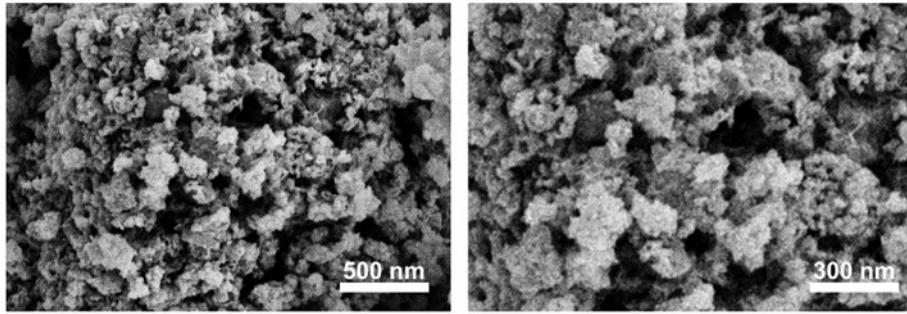

**Figure S5.** SEM images of CoSe.

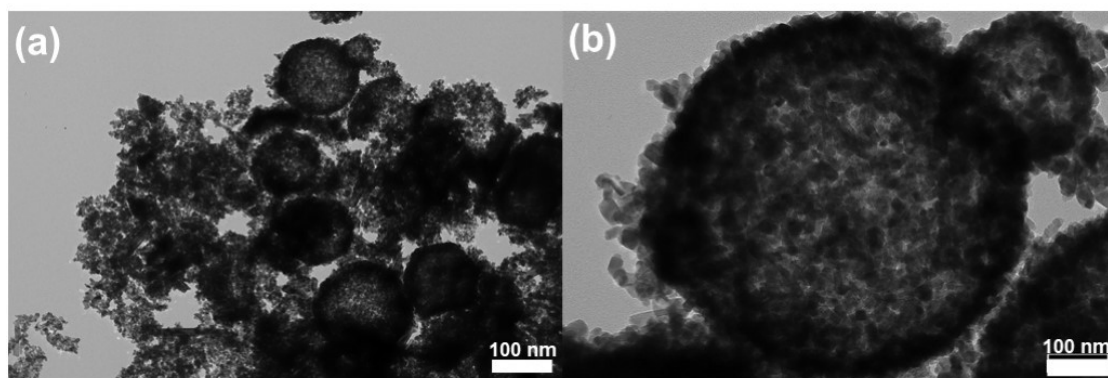

**Figure S6.** TEM images of CoFeSe.

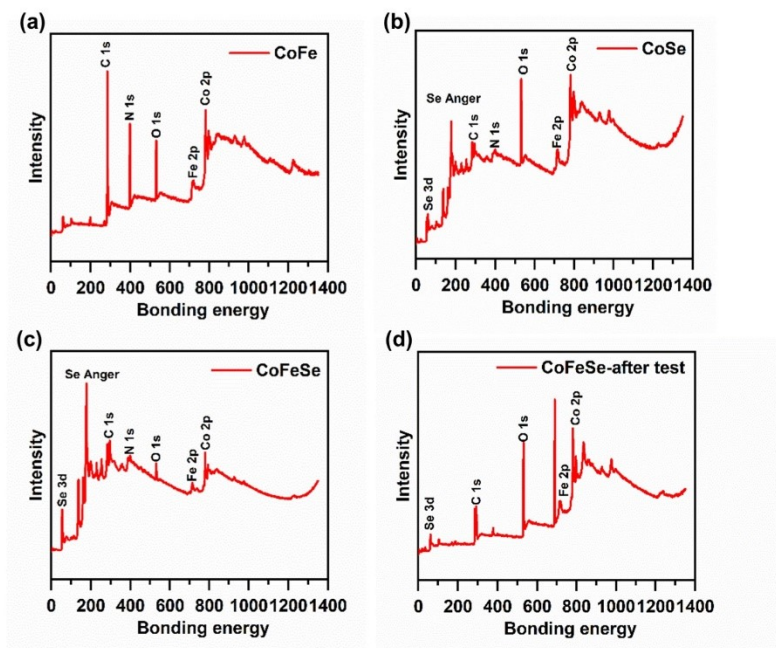

**Figure S7.** XPS overall spectrum of (a) CoFe-ZIF, (b) CoSe, (c) CoFeSe and (d) CoFeSe-after test in high-resolution.

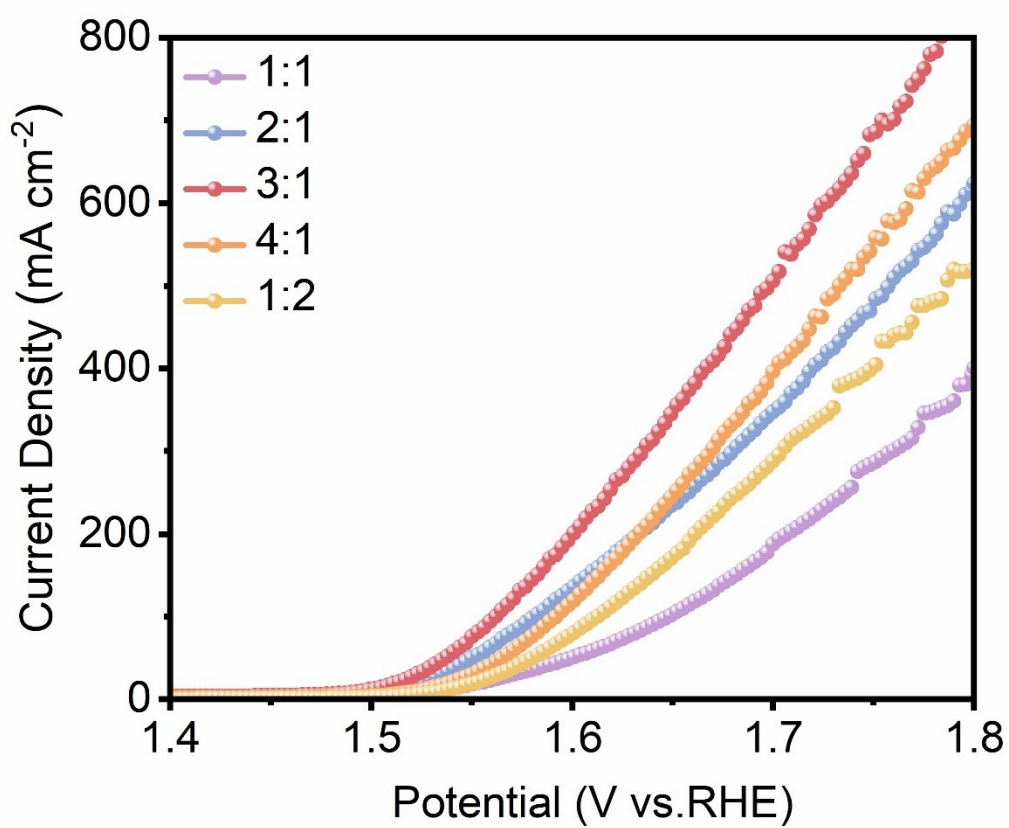

**Figure S8.** LSV curves of CoFeSe with different Se/Co ratios.

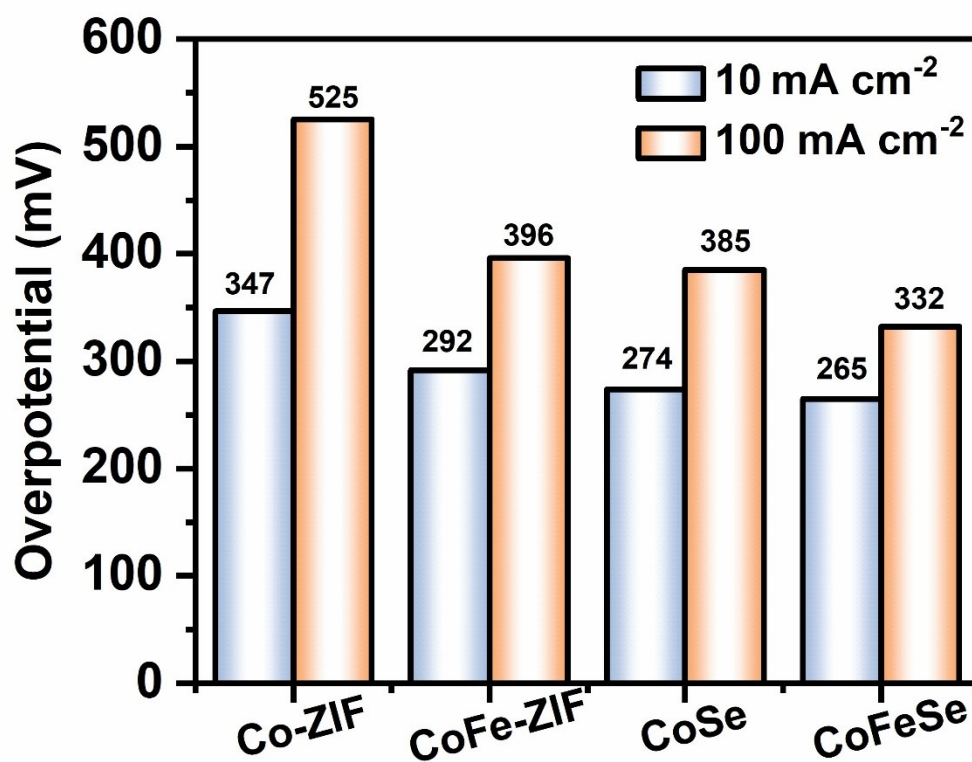

**Figure S9.** Overpotentials of the fabricated samples at the current densities 10 and 100 mA·cm<sup>-2</sup>.

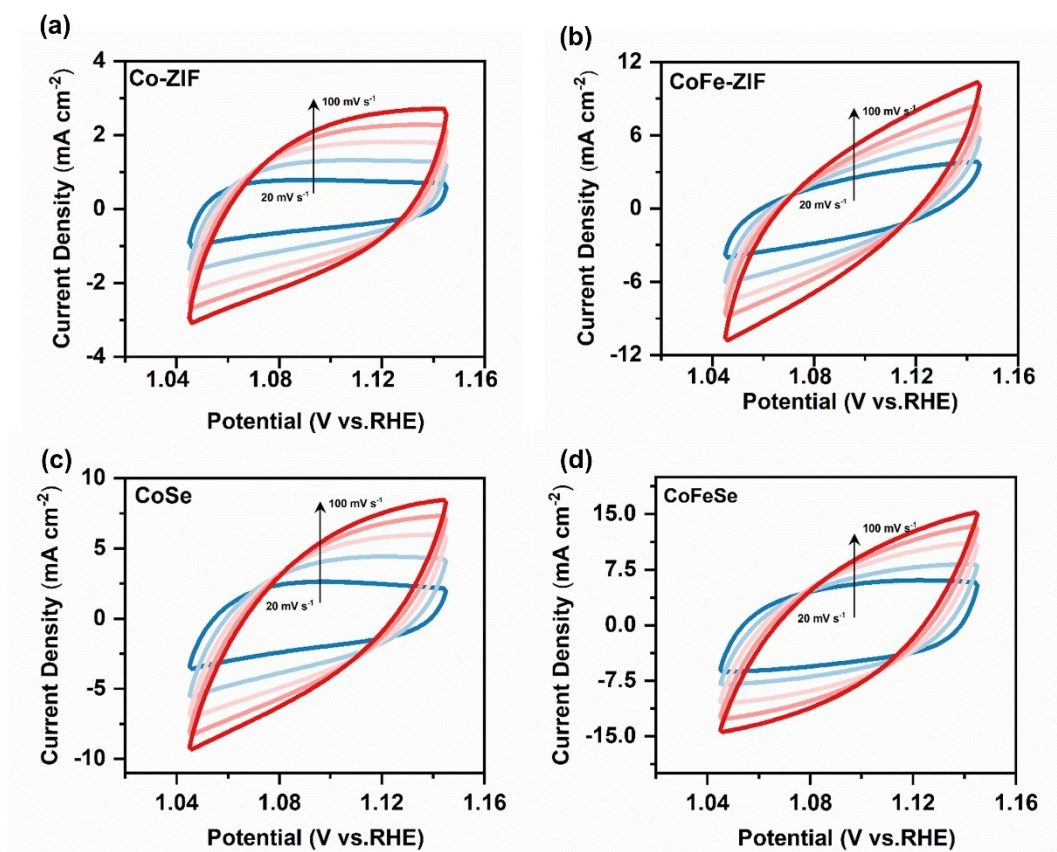

**Figure S10.** CV curves obtained in non-Faraday intervals for (a) Co-ZIF, (b) CoFe-ZIF, (c) CoSe, and (d) CoFeSe at different scan speeds from 20 to 100  $\text{mV s}^{-1}$ .

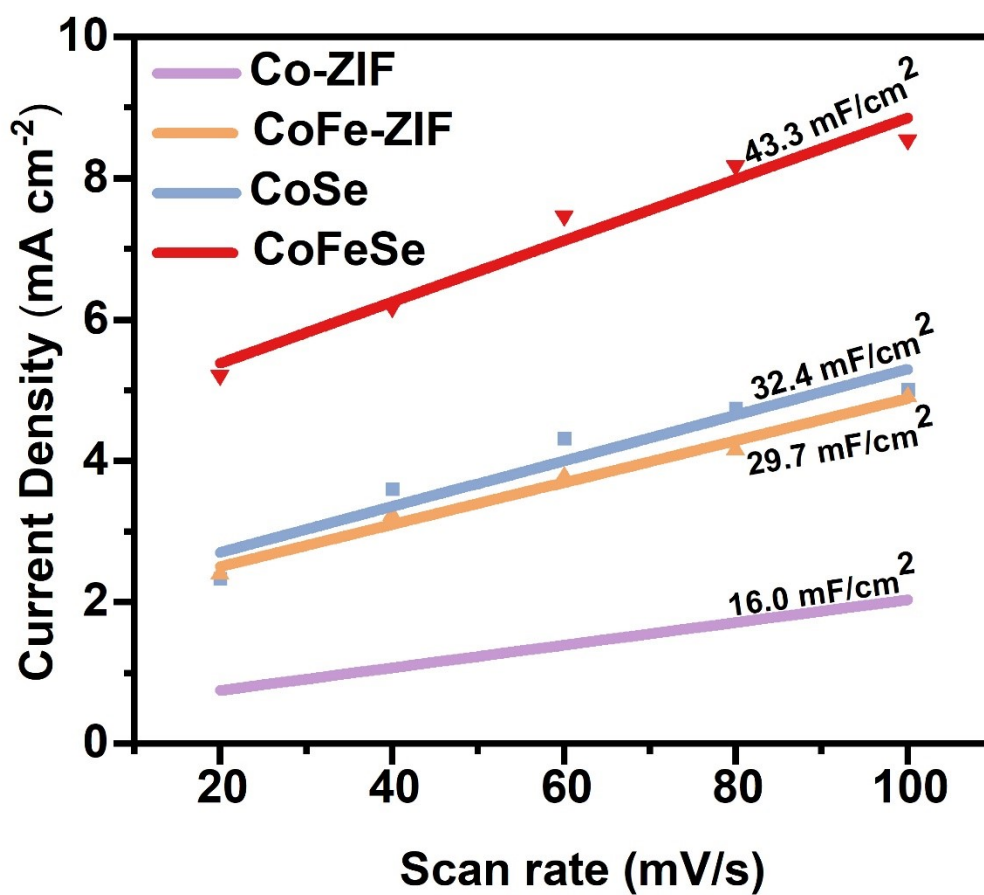

Figure S11. The  $C_{dl}$  of Co-ZIF, CoFe-ZIF, CoSe and CoFeSe.

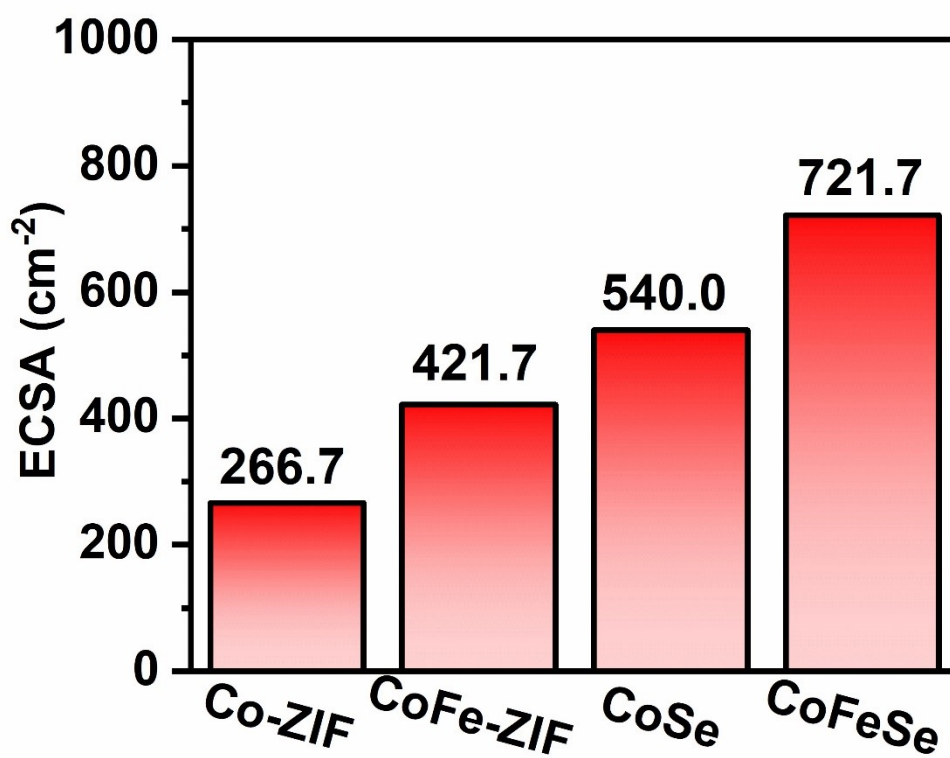

**Figure S12.** The ECSA of Co-ZIF, CoFe-ZIF, CoSe and CoFeSe.

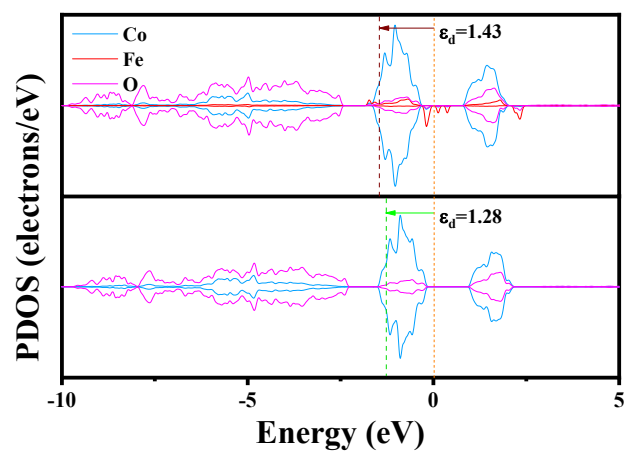

Figure S13 PDOS for CoOOH and CoFeOOH.

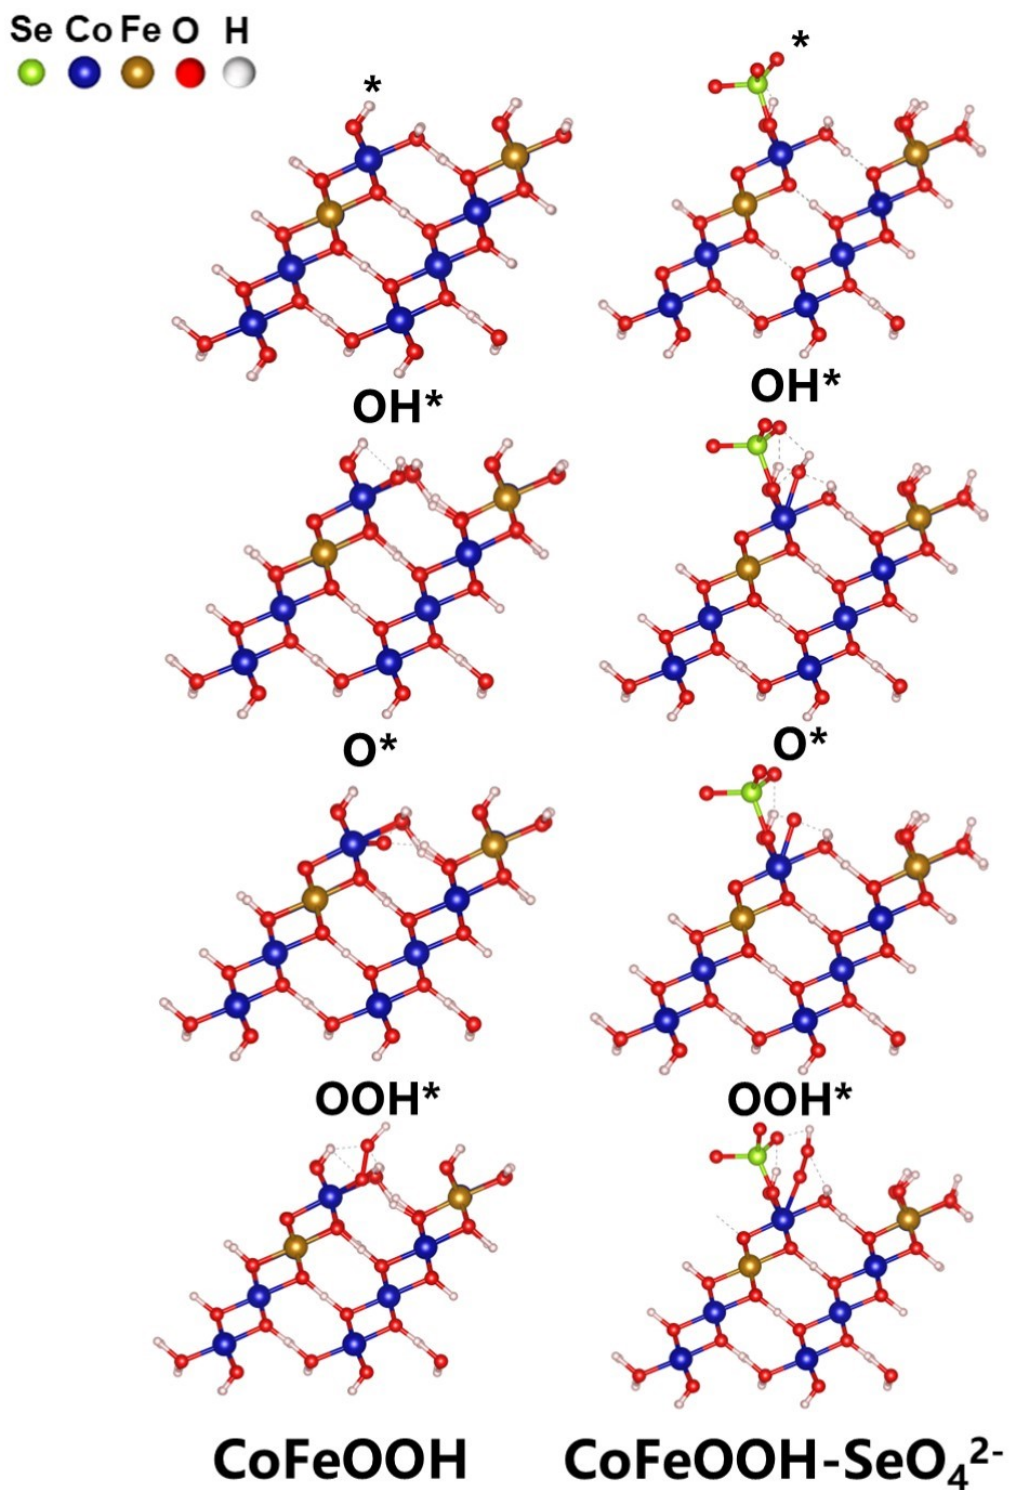

**Figure S14** The balanced geometric configuration and intermediate adsorption structure of CoFeOOH and CoFeOOH-SeO<sub>4</sub><sup>2-</sup>.

**Table S1.** The elements content in the fabricated samples based on the ICP-OES analysis

| <b>Catalysts</b> | <b>Co (wt.%)</b> | <b>Fe (wt.%)</b> |
|------------------|------------------|------------------|
| CoFeSe           | 35.6%            | 3.29%            |
| CoFe             | 34.8%            | 7.6%             |
| CoSe             | 38.1%            |                  |

**Table S2.** Comparison of the overpotential and Tafel slope of CoFeSe with reported ZIF-67 derived catalysts in alkaline electrolyte.

| Catalysts                                 | Overpotential<br>(mV) | Tafel<br>(mV dec <sup>-1</sup> ) | References |
|-------------------------------------------|-----------------------|----------------------------------|------------|
| CoFeSe                                    | 265                   | 57.3                             | This Work  |
| Co(OH) <sub>2</sub> -MoO <sub>3</sub> /NF | 273                   | 72                               | 1          |
| NiCoP                                     | 273                   | 88.9                             | 2          |
| Co-S@CA                                   | 291                   | 61.8                             | 3          |
| ZIF@NiBiCo                                | 300                   | 77                               | 4          |
| CoNC@FePc                                 | 314                   | 73.4                             | 5          |
| Z-67/Ni-V                                 | 320                   | 71                               | 6          |
| ZIF-67@Ni@FeOOH                           | 329                   | 42.95                            | 7          |
| Cu <sub>4</sub> -ZIF-67                   | 340                   | 65.64                            | 8          |
| ZIF-8/ZIF-67@Pd                           | 340                   | 85                               | 9          |
| ZIF-67 200                                | 347                   | 105.1                            | 10         |
| 75NZ67                                    | 350                   | 120                              | 11         |
| Co-LDH-1                                  | 354                   | 79.06                            | 12         |
| NiFe-LDH-Sn/ZIF-67                        | 360                   | 79                               | 13         |
| ZIF-67@Fe28                               | 379                   | 130                              | 14         |

## References

- 1 X. Duan, J. Cen, X. Qiu and X. Liu, *J. Electroanal. Chem.*, 2024, **961**, 118223.
- 2 M. Ding, Q. Yu, Z. Wei and D. Liu, *Mat. Sci. Semicon. Proc.*, 2025, **192**, 109461.
- 3 X. Zeng, H. Cong, N. Jiang, Q. Wang, J.-J. Shao, J. Zhao and D. Liu, *Langmuir*, 2025, **41**, 17779–17788.
- 4 J. Ding, X. Zhu, R. Yue, W. Liu, S. He, H. Pei, J. Zhu, H. Zheng, N. Liu and Z. Mo, *J. Electroanal. Chem.*, 2022, **923**, 116838.
- 5 X. Lin, D. Lin, W. Zhang, J. Liu, Y. Shen and J. Qian, *Front. Energy*, 2025, **19**, 1037–1044.
- 6 K. C. Devarayapalli, S. V. P. Vattikuti, J. Lee, T. Kim and K. Lee, *Int. J. Energy Res.*, 2022, **46**, 12229–12240.
- 7 S. Liu, Y. Zhang, L. Hao, A. Nsabimana and S. Shen, *Sep. and Purif. Technol.*, 2025, **354**, 129501.
- 8 L.-Y. Liu, F. Wang, S.-S. Cui, T.-T. Li, X.-M. Yang, Z. Liu and Y. Wang, *Int. J. Hydrogen Energ.*, 2024, **86**, 914–921.
- 9 Y. Wang, Y. Wang, L. Zhang, C.-S. Liu and H. Pang, *Inorg. Chem. Front.*, 2019, **6**, 2514–2520.
- 10 A. G. Dymerska, B. Środa, B. Zielińska and E. Mijowska, *Materials & Design*, 2023, **226**, 111637.
- 11 R. K. Swain, A. Kar, A. Halder and C. P. Pradeep, *Dalton Trans.*, 2025, **54**, 13294–13307.
- 12 Y. Chen, Z. Lv, J. Yuan, M. Bi and Y. Liang, *ChemistrySelect*, 2024, **9**, e202304989.
- 13 R. Ahmed, A. Enaiet Allah, A. A. Farghali, W. M. A. El Roubay and A. Abdelwahab, *Nanoscale Adv.*, 2025, **7**, 5401–5410.
- 14 Z. Xiao and F. Xu, *New J. Chem.*, 2022, **46**, 11095–11100.
